# Supplementary material
Source: PubMed Central journal article supplement (PMC8118972)
Supplement: AJNR-07-00462.pdf [file AJNR-07-00462.pdf]

**On-line Table 1: Summary of the quantitative results of various NMs from the nontreated and heat-killed *S aureus*-treated Jurket cell lines at different time points**

| Time Point (hrs) | FA Values before Infection (No.) | FA Values after Infection (No.) | Band Intensity Ratios in Nontreated Cell Lines |              |              |              | Band Intensity Ratios in Heat-Killed <i>S aureus</i> -Treated Cell Lines |              |                |         | ELISA |
|------------------|----------------------------------|---------------------------------|------------------------------------------------|--------------|--------------|--------------|--------------------------------------------------------------------------|--------------|----------------|---------|-------|
|                  |                                  |                                 | <i>IL1-β</i> /GAPDH                            | LFA-1/GAPDH  | TNF-α/GAPDH  | sICAM-1      | <i>IL1-β</i> /GAPDH                                                      | LFA-1/GAPDH  | TNF-α/GAPDH    | sICAM-1 |       |
| 1                | 0.15 ± 0.001                     | 0.16 ± 0.003                    | 0.68 ± 0.002                                   | Und          | 0.79 ± 0.001 | 0.71 ± 0.007 | 1.72 ± 0.01                                                              | 0.81 ± 0.016 | 1.30 ± 0.537   | ELISA   |       |
| 24               | 0.18 ± 0.001                     | 0.24 ± 0.003                    | 0.69 ± 0.001                                   | Und          | 0.80 ± 0.003 | 0.83 ± 0.007 | 2.91 ± 0.082                                                             | 0.91 ± 0.008 | 5.30 ± 1.554   | sICAM-1 |       |
| 48               | 0.20 ± 0.001                     | 0.37 ± 0.002                    | 0.71 ± 0.004                                   | 1.23 ± 0.222 | 0.89 ± 0.002 | 0.96 ± 0.008 | 3.78 ± 0.005                                                             | 1.33 ± 0.011 | 31.283 ± 1.430 |         |       |
| 72               | 0.21 ± 0.001                     | 0.51 ± 0.003                    | 0.74 ± 0.001                                   | 1.27 ± 0.270 | 1.05 ± 0.001 | 1.16 ± 0.001 | 4.17 ± 0.001                                                             | 1.62 ± 0.006 | 34.233 ± 1.346 |         |       |

**Note:**—hrs indicates hours; Und, undetectable.

**On-line Table 2: Summary of Pearson correlations (*r*) and *P* values at different time points in nontreated and heat-killed *S aureus*-treated Jurket cell lines**

| Time points (hrs) | Nontreated Cell Lines ( <i>r</i> , <i>P</i> ) |             |             |             | Heat-killed <i>S aureus</i> -Treated Cell Lines ( <i>r</i> , <i>P</i> ) |             |               |              |
|-------------------|-----------------------------------------------|-------------|-------------|-------------|-------------------------------------------------------------------------|-------------|---------------|--------------|
|                   | 1                                             | 24          | 48          | 72          | 1                                                                       | 24          | 48            | 72           |
| FA vs A           | 0.995; <.001                                  | 0.715; .110 | 0.537; .272 | 0.636; .104 | 0.975; .001                                                             | 0.842; .036 | 0.936; 0.006  | 0.939; .006  |
| FA vs B           | Und                                           | Und         | Und         | Und         | 0.990; <.001                                                            | 0.973; .001 | 0.987; <0.001 | 0.991; <.001 |
| FA vs C           | 0.958; .003                                   | 0.689; .130 | 0.768; .075 | 0.707; .116 | 0.860; .028                                                             | 0.825; .043 | 0.889; .018   | 0.878; .021  |
| FA vs D           | 0.696; .125                                   | Und         | Und         | 0.858; .095 | 0.693; .127                                                             | 0.944; .005 | 0.898; .015   | 0.858; .029  |
| A vs B            | Und                                           | Und         | Und         | Und         | 0.971; .001                                                             | 0.844; .013 | 0.956; .003   | 0.922; .009  |
| A vs C            | 0.954; .003                                   | 0.465; .352 | 0.896; .021 | 0.896; .016 | 0.948; .004                                                             | 0.825; .043 | 0.960; .002   | 0.818; .047  |
| A vs D            | 0.634; .177                                   | Und         | Und         | Und         | 0.730; .099                                                             | 0.765; .077 | 0.894; .016   | 0.921; .009  |
| B vs C            | Und                                           | Und         | Und         | Und         | 0.858; .029                                                             | 0.904; .013 | 0.895; .016   | 0.926; .008  |
| B vs D            | Und                                           | Und         | 0.302; .561 | 0.897; .068 | 0.698; .122                                                             | 0.952; .003 | 0.900; .015   | 0.807; .052  |
| C vs D            | 0.552; .257                                   | Und         | Und         | Und         | 0.764; .077                                                             | 0.774; .071 | 0.956; .003   | 0.943; .005  |

**Note:**—hrs indicates hours; Und, undetectable; A, *IL1-β*; B, LFA-1; C, TNF- $\alpha$ ; D, sICAM-1.
